# Supplementary material for: X-ray excited luminescence spectroscopy and imaging with NaGdF4:Eu and Tb
Source: PubMed Central journal article supplement (PMC9041542; doi:10.1039/d1ra05451a), 2021-09-24
Supplement: RA-011-D1RA05451A-s001.pdf [file RA-011-D1RA05451A-s001.pdf]

## Supporting Information: X-Ray Excited Luminescence Spectroscopy and Imaging with NaGdF<sub>4</sub>:Eu and Tb

Meenakshi Ranasinghe<sup>a</sup>, Md. Arifuzzaman<sup>a</sup>, Apeksha C. Rajamanthrilage<sup>a</sup>, W. R. Willoughby<sup>b</sup>  
Ashley Dickey<sup>a</sup>, Colin McMillen<sup>a</sup>, Joseph W. Kolis<sup>a</sup>, Mark Bolding<sup>b</sup>, Jeffrey N. Anker<sup>\*a</sup>

<sup>a</sup>Department of Chemistry, Clemson University, Clemson, SC; and Center for Optical Materials Engineering and Technology (COMSET)

<sup>a</sup>Department of Radiology, University of Alabama at Birmingham School of Medicine, Birmingham, AL;

E-Mail: mranasi@g.clemson.edu; marifuz@g.clemson.edu; apekshr@g.clemson.edu; dickey@g.clemson.edu; cmcmill@clemson.edu; kjoseph@clemson.edu; mbolding@uabmc.edu; janker@clemson.edu

| Figure |                                                                                                                                              | Page |
|--------|----------------------------------------------------------------------------------------------------------------------------------------------|------|
| S1     | TEM images of NaGdF <sub>4</sub> :Eu and XRD patterns of Eu- and Tb-doped NaGdF <sub>4</sub> synthesized using the co-precipitate method.    | 2    |
| S2     | TEM images of NaGdF <sub>4</sub> :Eu and XRD patterns of Eu- and Tb-doped NaGdF <sub>4</sub> synthesized using the hydrothermal method.      | 2    |
| S3     | X-ray excited optical luminescence (XEOL) spectra of synthesized, silica coated, and silica coated annealed Eu-doped NaGdF <sub>4</sub> NPs. | 3    |
| S4     | TGA thermograms of synthesized nanophosphors, sodium citrate and PVP.                                                                        | 3    |
| S5     | XEOL spectra of NaGdF <sub>4</sub> :Eu@SiO <sub>2</sub> unannealed and annealed at 150, 400, 600 °C for 12 hours.                            | 4    |
| S6     | Fullscale XEOL spectra of NaGdF <sub>4</sub> : Eu in capillaries A) without tissue B) sandwiched between 5 mm slices of porcine tissue.      | 4    |

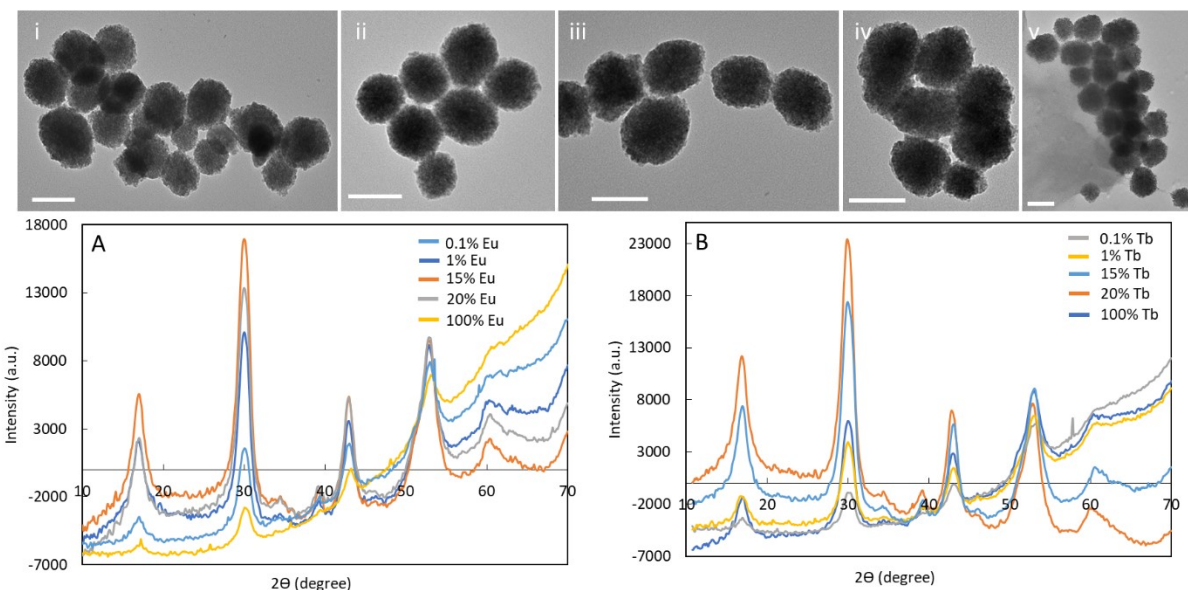

**Figure S1.** TEM images of NaGdF<sub>4</sub> doped with (i) 0.1%, (ii) 1%,(iii) 15%,(iv) 20%,(v) 100% Eu synthesized using the co-precipitate method. Scale bar is equal to 100 nm. XRD patterns of (A) Eu- and (B) Tb-doped NaGdF<sub>4</sub> (Gd: dopant molar ratio= 1: 0.1, 1, 15, 20, 100%). XRD data were collected using single-crystal XRD as an alternative of powder XRD. PDF card is 27-0699.

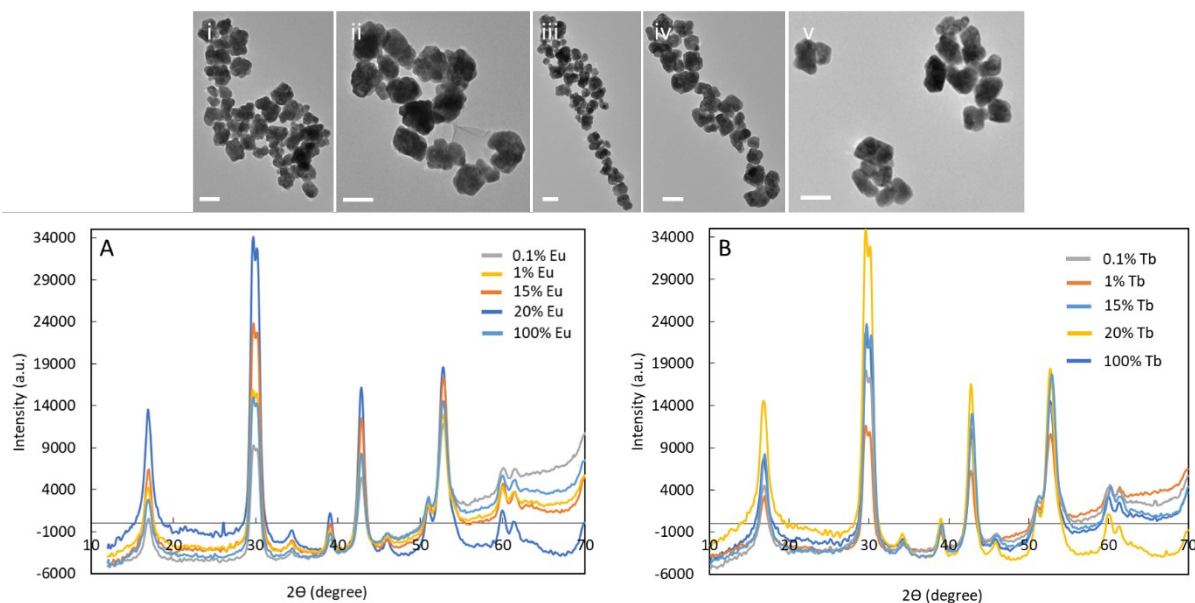

**Figure S2.** TEM images of NaGdF<sub>4</sub> doped with (i) 0.1%, (ii) 1%,(iii) 15%,(iv) 20%,(v) 100% Eu synthesized using the hydrothermal method. Scale bar is equal to 100 nm. XRD patterns of (A) Eu- and (B) Tb-doped NaGdF<sub>4</sub> (Gd: dopant molar ratio= 1: 0.1, 1, 15, 20, 100%). XRD data were collected using single-crystal XRD as an alternative of powder XRD. PDF card is 27-0699

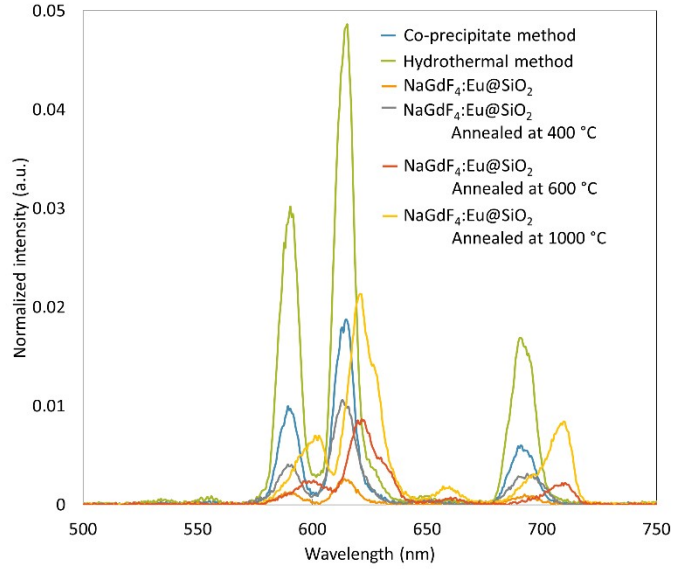

**Figure S3.** X-ray excited optical luminescence (XEOL) spectra of bare synthesized, silica coated, and silica coated annealed Eu-doped NaGdF<sub>4</sub> NPs.

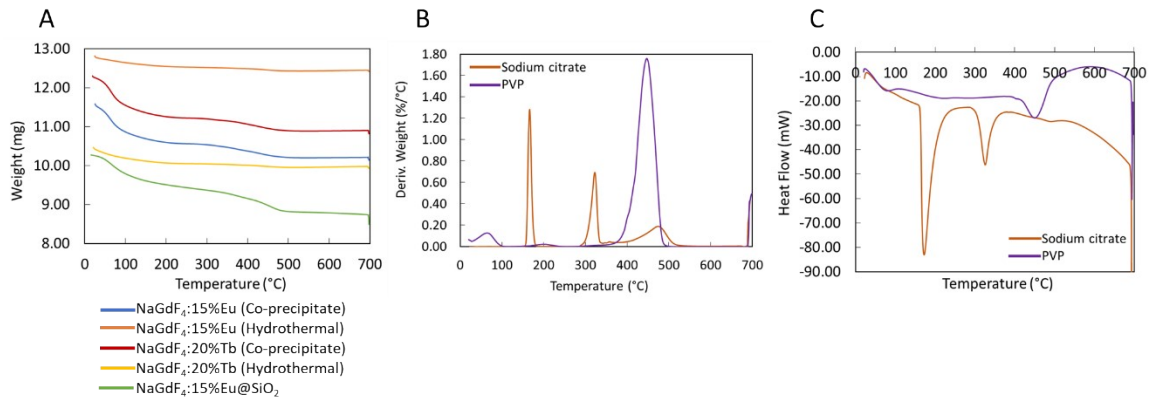

**Figure S4.** TGA thermograms showing (A) weight loss of synthesized nanophosphors, (B) derivative of weight loss (C) DSC of sodium citrate and PVP.

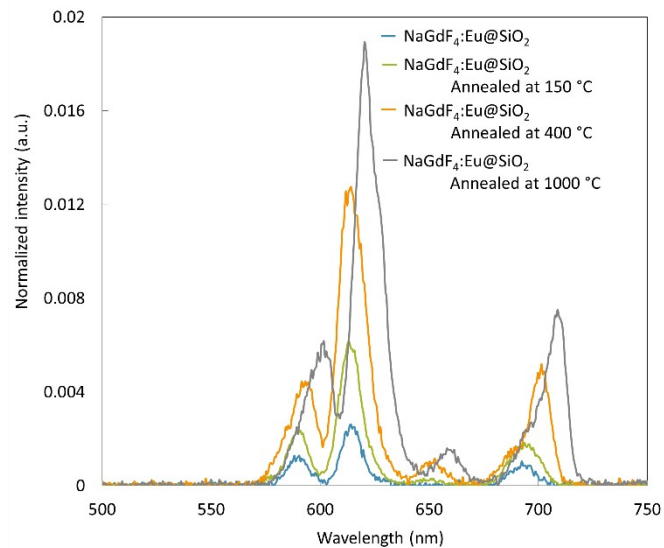

**Figure S5.** XEOL spectra of  $\text{NaGdF}_4:\text{Eu}@\text{SiO}_2$  unannealed and annealed at 150, 400, 1000 °C for 12 hours.

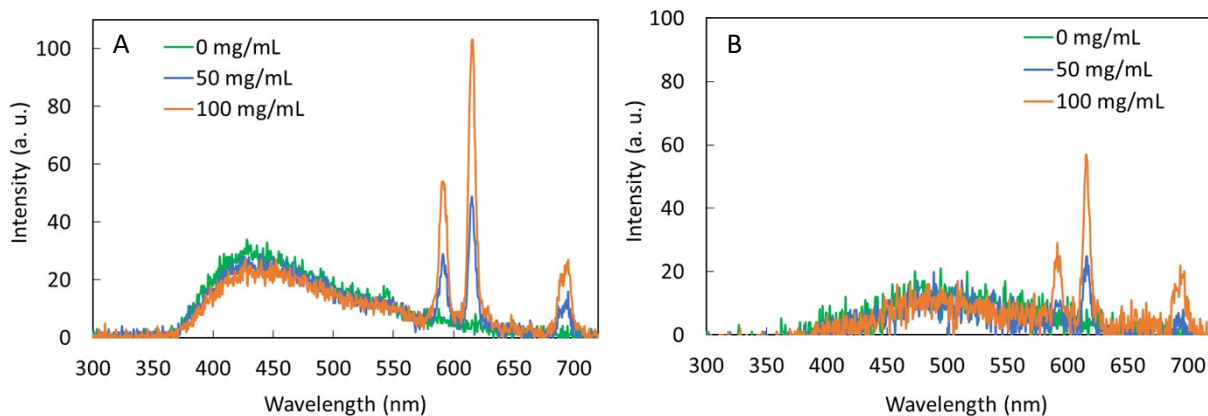

**Figure S6.** Full-scale XEOL of  $\text{NaGdF}_4:\text{Eu}$  in capillaries A) without tissue B) sandwiched between 5 mm slices of porcine tissue.
